# Supplementary material for: Wild bees of Grand Staircase-Escalante National Monument: richness, abundance, and spatio-temporal beta-diversity
Source: PeerJ journal article supplement (doi:10.7717/peerj.5867), 2018-11-07
Supplement: Supplement_A-Final-R2-JSW.pdf [file Supplement_A-Final-R2-JSW.pdf]

## Supplement A.

A list of all identified bee specimens collected in Grand Staircase Escalante National Monument between 2000 and 2003. Bees are arranged by family, subfamily, genus, subgenus, and finally species. New species (n. sp.) are those that differ from all published keys and are unique after comparison with all specimens located at the U.S. National Pollinating Insects Laboratory (a collection of nearly 2 million specimens). They are listed with their closest affiliation. Species that do not match with specimen descriptions exactly, nor with known specimens, but are not entirely distinct may represent either variants or new species. We have conservatively listed these as 'sp.', rather than as new species, with the closest affiliation in parentheses.

Notes of biogeographical interest are in the last column, and are coded as follows: CP: Endemic to the Colorado Plateau; E: Easternmost occurrence of the bee; GB: Endemic to the Great Basin; GSENM: Found only in GSENM; MD: Previously recorded only in the Mojave Desert; NG: New genus for the state of Utah; N: Northernmost occurrence of the bee; NS: New species for the state of Utah; SD: Previously reported only in the Sonoran Desert; S: Southernmost occurrence of the bee; W: Westernmost occurrence of the bee.

\* *Agapostemon angelicus* and *A. texanus* females are impossible to distinguish. The number of specimens reported for each of these two species is for the males only, which can be identified.

## Bee Species in GSENM

**660 species, 55 genera, 49 new species**

**Andrenidae, 181 species, 7 genera, 22 new species**

### Andreninae

|                                                                       |     |    |
|-----------------------------------------------------------------------|-----|----|
| <i>Ancylandrena</i> , 1 species                                       |     |    |
| <i>Ancylandrena timberlakei</i> Zavortink, 1974                       | 1   |    |
| <i>Andrena</i> , 71 species, 3 new species                            |     |    |
| <i>Andrena (Andrena) frigida</i> Smith, 1853                          | 7   |    |
| <i>Andrena (Andrena) macoupinensis</i> Robertson, 1900                | 26  |    |
| <i>Andrena (Andrena) milwaukeeensis</i> Graenicher, 1903              | 339 |    |
| <i>Andrena (Andrena) schuhi</i> LaBerge, 1980                         | 289 |    |
| <i>Andrena (Belandrena) sphaeralceae</i> Linsley, 1939                | 14  |    |
| <i>Andrena (Callandrena) accepta</i> Viereck, 1916                    | 6   |    |
| <i>Andrena (Callandrena) haynesi</i> Viereck and Cockerell, 1914      | 3   | W  |
| <i>Andrena (Callandrena) helianthi</i> Robertson, 1891                | 5   |    |
| <i>Andrena (Callandrena) neomexicana</i> LaBerge, 1967                | 10  | CP |
| <i>Andrena (Callandrena) pecosana</i> Cockerell, 1913                 | 14  |    |
| <i>Andrena (Callandrena) utahensis</i> LaBerge, 1967                  | 112 |    |
| <i>Andrena (Callandrena) vulpicolor</i> Cockerell, 1897               | 25  |    |
| <i>Andrena (Callandrena) n. sp. 1</i>                                 | 25  |    |
| <i>Andrena (Callandrena) sp. 2 (aff. simulata)</i>                    | 1   |    |
| <i>Andrena (Callandrena) sp. 1 (aff. pecosana)</i>                    | 8   |    |
| <i>Andrena (Cnemidandrena) ramaleyi</i> Cockerell, 1931               | 107 |    |
| <i>Andrena (Cnemidandrena) costillensis</i> Viereck & Cockerell, 1914 | 66  |    |
| <i>Andrena (Cnemidandrena) sp. 3 (aff. aurihirta)</i>                 | 91  |    |
| <i>Andrena (Cnemidandrena) sp. 4 (aff. colletina)</i>                 | 63  |    |
| <i>Andrena (Cnemidandrena) n. sp. 2 (aff. costillensis)</i>           | 21  |    |
| <i>Andrena (Conandrena) cheyennorum</i> Viereck & Cockerell, 1914     | 84  |    |
| <i>Andrena (Dactylandrena) porterae</i> Cockerell, 1900               | 2   |    |
| <i>Andrena (Dasyandrena) cristata</i> Viereck, 1917                   | 5   |    |
| <i>Andrena (Diandrena) evoluta</i> Linsley & MacSwain, 1961           | 334 |    |
| <i>Andrena (Euandrena) astragali</i> Viereck & Cockerell, 1914        | 18  | S  |
| <i>Andrena (Euandrena) chlorura</i> Cockerell, 1916                   | 23  |    |
| <i>Andrena (Euandrena) lawrencei</i> Viereck & Cockerell, 1914        | 11  |    |
| <i>Andrena (Euandrena) nigrihirta</i> (Ashmead, 1890)                 | 13  |    |
| <i>Andrena (Euandrena) sp. 5 (aff. auricoma)</i>                      | 1   |    |
| <i>Andrena (Euandrena) sp. 6 (aff. nigrihirta)</i>                    | 3   |    |
| <i>Andrena (Holandrena) cressonii infasciata</i> Lanham, 1949         | 48  |    |
| <i>Andrena (Leucandrena) barbilabris</i> (Kirby, 1802)                | 17  |    |
| <i>Andrena (Melandrena) cerasifolii</i> Cockerell, 1896               | 44  |    |

|                                                                            |      |       |
|----------------------------------------------------------------------------|------|-------|
| <i>Andrena (Melandrena) lupinorum</i> Cockerell, 1906                      | 1082 |       |
| <i>Andrena (Melandrena) sola</i> Viereck, 1917                             | 7    |       |
| <i>Andrena (Melandrena) transnigra</i> Viereck, 1904                       | 28   |       |
| <i>Andrena (Micrandrena) illinoiensis</i> Robertson, 1891                  | 7    |       |
| <i>Andrena (Micrandrena) kristina</i> Lanham, 1983                         | 21   | NS, W |
| <i>Andrena (Micrandrena) melanochoa</i> Cockerell, 1898                    | 2    | S     |
| <i>Andrena (Micrandrena) piperi</i> Viereck, 1904                          | 51   |       |
| <i>Andrena (Onagrandrena) anograe knowltoni</i> Linsley and MacSwain, 1961 | 30   |       |
| <i>Andrena (Onagrandrena) linsleyana</i> Thorp, 1987                       | 26   | CP    |
| <i>Andrena (Parandrena) andrenoides</i> (Cresson, 1878)                    | 84   |       |
| <i>Andrena (Parandrena) papagorum</i> Viereck & Cockerell, 1914            | 3    |       |
| <i>Andrena (Parandrena) wellesleyana</i> Robertson, 1897                   | 32   |       |
| <i>Andrena (Plastandrena) prunorum</i> Cockerell, 1896                     | 534  |       |
| <i>Andrena (Rhaphandrena) prima</i> Casad, 1896                            | 9    |       |
| <i>Andrena (Scaphandrena) bruneri</i> Viereck & Cockerell, 1914            | 82   |       |
| <i>Andrena (Scaphandrena) chapmanae</i> Viereck, 1904                      | 31   |       |
| <i>Andrena (Scaphandrena) cruciferarum</i> Ribble, 1974                    | 1    | NS    |
| <i>Andrena (Scaphandrena) hicksi</i> Cockerell, 1925                       | 2    |       |
| <i>Andrena (Scaphandrena) kaibabensis</i> Ribble, 1974                     | 47   | CP    |
| <i>Andrena (Scaphandrena) merriami</i> Cockerell, 1901                     | 13   |       |
| <i>Andrena (Scaphandrena) montrosensis</i> Viereck and Cockerell, 1914     | 12   |       |
| <i>Andrena (Scaphandrena) nigricula</i> LaBerge & Bouseman, 1977           | 80   |       |
| <i>Andrena (Scaphandrena) scurra</i> Viereck, 1904                         | 40   |       |
| <i>Andrena (Scaphandrena) sieverti</i> Cockerell, 1906                     | 6    |       |
| <i>Andrena (Scaphandrena) n. sp. (aff. kaibabensis)</i>                    | 16   |       |
| <i>Andrena (Scrapheropsis) imitatrix</i> Cresson, 1872                     | 1    |       |
| <i>Andrena (Simandrena) angustitarsata</i> Viereck, 1904                   | 13   |       |
| <i>Andrena (Thysandrena) medionitens</i> Cockerell, 1902                   | 413  |       |
| <i>Andrena (Thysandrena) w-scripta</i> Viereck, 1904                       | 178  |       |
| <i>Andrena (Thysandrena) sp. 7 (aff. medionitens)</i>                      | 15   |       |
| <i>Andrena (Thysandrena) sp. 8 (aff. w-scripta)</i>                        | 10   |       |
| <i>Andrena (Trachandrena) cupreotincta</i> Cockerell, 1901                 | 418  |       |
| <i>Andrena (Trachandrena) forbesii</i> Robertson, 1891                     | 1    |       |
| <i>Andrena (Trachandrena) salicifloris</i> Cockerell, 1897                 | 1    | S     |
| <i>Andrena (Trachandrena) striatifrons</i> Cockerell, 1897                 | 32   |       |
| <i>Andrena (Trachandrena) zionensis</i> LaBerge, 1973                      | 234  | W     |
| <i>Andrena (Tylandrena) hallii</i> Dunning, 1898                           | 32   |       |
| <i>Andrena (Tylandrena) subaustralis</i> Cockerell, 1898                   | 52   |       |

Panurginae

|                                                                     |      |           |
|---------------------------------------------------------------------|------|-----------|
| <i>Calliopsis</i> , 4 species                                       |      |           |
| <i>Calliopsis (Calliopsima) chlorops</i> Cockerell, 1899            | 116  |           |
| <i>Calliopsis (Calliopsima) philiphunteri</i> Shinn and Engel, 2003 | 32   |           |
| <i>Calliopsis (Nomadopsis) puellae</i> (Cockerell, 1933)            | 35   |           |
| <i>Calliopsis (Nomadopsis) timberlakei</i> (Rozen, 1958)            | 19   |           |
| <i>Macrotera</i> , 4 species, 1 new species                         |      |           |
| <i>Macrotera (Macroterella) opacella</i> (Timberlake, 1956)         | 61   |           |
| <i>Macrotera (Macroteropsis) arcuata</i> (Fox, 1893)                | 1    |           |
| <i>Macrotera (Macroteropsis) latior</i> (Cockerell, 1896)           | 1    |           |
| <i>Macrotera (Macroteropsis) n. sp. (aff. portalis)</i>             | 3    |           |
| <i>Panurginus</i> , 2 species                                       |      |           |
| <i>Panurginus</i> sp. 1                                             | 1    |           |
| <i>Panurginus</i> sp. 2                                             | 6    |           |
| <i>Perdita</i> , 87 species, 16 new species                         |      |           |
| <i>Perdita (Allomacrotera) moabensis</i> Timberlake, 1971           | 36   | CP        |
| <i>Perdita (Cockerellia) albipennis</i> Cresson, 1868               | 81   |           |
| <i>Perdita (Cockerellia) coreopsidis kansensis</i> Timberlake, 1953 | 1    |           |
| <i>Perdita (Cockerellia) imbellis</i> Timberlake, 1968              | 74   | CP        |
| <i>Perdita (Cockerellia) lingualis</i> Cockerell, 1896              | 3    | S         |
| <i>Perdita (Cockerellia) perpulchra</i> Cockerell, 1896             | 121  |           |
| <i>Perdita (Cockerellia) verbessinae</i> Cockerell, 1896            | 12   |           |
| <i>Perdita (Epimacrotera) crassula</i> Timberlake, 1958             | 2    |           |
| <i>Perdita (Glossoperdita) n. sp. 14 (aff. giliae)</i>              | 164  |           |
| <i>Perdita (Hexaperdita) asteris</i> Cockerell, 1896                | 81   |           |
| <i>Perdita (Hexaperdita) heterothecae</i> Cockerell, 1900           | 18   | NS        |
| <i>Perdita (Perdita) aridella</i> Timberlake, 1960                  | 1095 |           |
| <i>Perdita (Perdita) calloleuca</i> Cockerell, 1922                 | 5859 |           |
| <i>Perdita (Perdita) croceipes</i> Timberlake, 1960                 | 11   | N         |
| <i>Perdita (Perdita) crotonis juabensis</i> Timberlake, 1962        | 1    |           |
| <i>Perdita (Perdita) depressa</i> Timberlake, 1968                  | 133  |           |
| <i>Perdita (Perdita) dubia parilis</i> Timberlake, 1958             | 120  |           |
| <i>Perdita (Perdita) electa</i> Timberlake, 1960                    | 67   |           |
| <i>Perdita (Perdita) euzonata</i> Timberlake, 1964                  | 6    |           |
| <i>Perdita (Perdita) fallax</i> Cockerell, 1896                     | 300  |           |
| <i>Perdita (Perdita) festiva</i> Timberlake, 1958                   | 898  | CP        |
| <i>Perdita (Perdita) glabrescens</i> Timberlake, 1962               | 1    | NS        |
| <i>Perdita (Perdita) hirsuta</i> Cockerell, 1896                    | 3    | NS,<br>MD |
| <i>Perdita (Perdita) holoxantha</i> Timberlake, 1962                | 11   | CP        |
| <i>Perdita (Perdita) idonea</i> Timberlake, 1968                    | 56   |           |
| <i>Perdita (Perdita) knowltoni</i> Timberlake, 1960                 | 268  | CP        |

|                                                                |      |       |
|----------------------------------------------------------------|------|-------|
| <i>Perdita (Perdita) labergei</i> Timberlake, 1960             | 54   |       |
| <i>Perdita (Perdita) lepidosparti</i> Timberlake, 1958         | 7    |       |
| <i>Perdita (Perdita) luteola</i> Cockerell, 1894               | 383  |       |
| <i>Perdita (Perdita) mesillensis</i> Timberlake, 1968          | 23   | NS    |
| <i>Perdita (Perdita) morula</i> Timberlake, 1980               | 200  |       |
| <i>Perdita (Perdita) munda</i> Timberlake, 1958                | 61   | CP    |
| <i>Perdita (Perdita) nasuta obscuresscens</i> Timberlake, 1962 | 55   |       |
| <i>Perdita (Perdita) nuda</i> Cockerell, 1896                  | 199  |       |
| <i>Perdita (Perdita) phymatae</i> Cockerell, 1895              | 706  |       |
| <i>Perdita (Perdita) rectangulata</i> Cockerell, 1896          | 115  | NS    |
| <i>Perdita (Perdita) salicis imperialis</i> Cockerell, 1925    | 67   |       |
| <i>Perdita (Perdita) salicis salicis</i> Cockerell, 1896       | 97   |       |
| <i>Perdita (Perdita) salicis subtristis</i> Cockerell, 1933    | 128  |       |
| <i>Perdita (Perdita) similis</i> Timberlake, 1958              | 1533 |       |
| <i>Perdita (Perdita) subfasciata</i> Cockerell, 1897           | 2617 |       |
| <i>Perdita (Perdita) tortifoliae</i> Cockerell, 1906           | 350  |       |
| <i>Perdita (Perdita) vestita</i> Timberlake, 1958              | 263  | CP    |
| <i>Perdita (Perdita) wilmattae miriconis</i> Cockerell, 1922   | 18   | GB    |
| <i>Perdita (Perdita) xanthochroa</i> Timberlake, 1960          | 198  | CP    |
| <i>Perdita (Perdita) xerophila discrepans</i> Timberlake, 1962 | 64   | E, MD |
| <i>Perdita (Perdita) zebrata flavens</i> Timberlake, 1958      | 2663 |       |
| <i>Perdita (Perdita) zebrata zebrata</i> Cresson, 1878         | 85   |       |
| <i>Perdita (Perdita) sp. 2 (aff. xanthochroa)</i>              | 7    |       |
| <i>Perdita (Perdita) sp. 3 (aff. varley)</i>                   | 1    |       |
| <i>Perdita (Perdita) sp. 4 (aff. punctifera)</i>               | 5    |       |
| <i>Perdita (Perdita) sp. 5 (aff. munda)</i>                    | 103  |       |
| <i>Perdita (Perdita) sp. 6 (aff. luteiventris)</i>             | 13   |       |
| <i>Perdita (Perdita) sp. 7 (aff. lateralis)</i>                | 33   |       |
| <i>Perdita (Perdita) sp. 8 (aff. koebelei)</i>                 | 3    |       |
| <i>Perdita (Perdita) sp. 9 (aff. fuscipes)</i>                 | 35   |       |
| <i>Perdita (Perdita) sp. 10 (aff. aridella)</i>                | 422  |       |
| <i>Perdita (Perdita) sp. 11 (aff. apacheorum)</i>              | 41   |       |
| <i>Perdita (Perdita) sp. E1</i>                                | 171  |       |
| <i>Perdita (Perdita) sp. E4</i>                                | 25   |       |
| <i>Perdita (Perdita) sp. E8</i>                                | 1    |       |
| <i>Perdita (Perdita) n. sp. 1</i>                              | 270  |       |
| <i>Perdita (Perdita) n. sp. 2 (aff. zebrata)</i>               | 166  |       |
| <i>Perdita (Perdita) n. sp. 3 (aff. tortifoliae)</i>           | 1    |       |
| <i>Perdita (Perdita) n. sp. 4 (aff. subfasciata)</i>           | 145  |       |
| <i>Perdita (Perdita) n. sp. 5 (aff. sphaeralceae)</i>          | 15   |       |
| <i>Perdita (Perdita) n. sp. 6 (aff. luteola)</i>               | 1    |       |

|                                                                      |     |
|----------------------------------------------------------------------|-----|
| <i>Perdita (Perdita)</i> n. sp. 7 (aff. <i>laticincta</i> )          | 6   |
| <i>Perdita (Perdita)</i> n. sp. 8 (aff. <i>laticincta</i> )          | 2   |
| <i>Perdita (Perdita)</i> n. sp. 9 (aff. <i>gerhardi</i> )            | 2   |
| <i>Perdita (Perdita)</i> n. sp. 10 (aff. <i>eremica</i> )            | 192 |
| <i>Perdita (Perdita)</i> n. sp. 11 (aff. <i>elongaticeps</i> )       | 1   |
| <i>Perdita (Perdita)</i> n. sp. 12 (aff. <i>cuspidata</i> )          | 13  |
| <i>Perdita (Perdita)</i> n. sp. 13 (aff. <i>confusa</i> )            | 157 |
| <i>Perdita (Perdita)</i> n. sp. 14 (aff. <i>zonalis</i> )            | 12  |
| <i>Perdita (Perdita)</i> n. sp. 15                                   | 103 |
| <i>Perdita (Procockerellia) albonotata</i> Timberlake, 1954          | 26  |
| <i>Perdita (Pygoperdita) duplonotata</i> Timberlake, 1956            | 527 |
| <i>Perdita (Pygoperdita) fallugiaie</i> Timberlake, 1956             | 11  |
| <i>Perdita (Pygoperdita) mormonica</i> Timberlake, 1956              | 3   |
| <i>Perdita (Pygoperdita) sp. 1</i> (aff. <i>mohavensis</i> )         | 7   |
| <i>Perdita (Xeromacrotera) cephalotes</i> (Cresson, 1878)            | 252 |
| <i>Perdita</i> sp. E2                                                | 8   |
| <i>Perdita</i> sp. E5                                                | 7   |
| <i>Perdita</i> sp. E3                                                | 1   |
| <i>Perdita</i> sp. E9                                                | 27  |
| <i>Perdita</i> sp. E10                                               | 5   |
| <i>Perdita</i> sp. E11                                               | 1   |
| <i>Perdita</i> sp. E12                                               | 2   |
| <i>Perdita</i> sp. E13                                               | 5   |
| <i>Pseudopanurgus</i> , 12 species, 2 new species                    |     |
| <i>Pseudopanurgus (Heterosarus) bakeri</i> (Cockerell, 1896)         | 1   |
| <i>Pseudopanurgus (Heterosarus)</i> n. sp.                           | 64  |
| <i>Pseudopanurgus (Heterosarus)</i> sp. E1                           | 6   |
| <i>Pseudopanurgus (Heterosarus)</i> sp. E2                           | 11  |
| <i>Pseudopanurgus (Heterosarus)</i> sp. E3                           | 62  |
| <i>Pseudopanurgus (Pterosarus) irregularis</i> (Cockerell, 1922)     | 158 |
| <i>Pseudopanurgus (Pterosarus)</i> sp. 1 (aff. <i>porterae</i> )     | 1   |
| <i>Pseudopanurgus (Pterosarus)</i> sp. E1                            | 36  |
| <i>Pseudopanurgus (Pterosarus)</i> sp. E2                            | 6   |
| <i>Pseudopanurgus (Pterosarus)</i> sp. E3                            | 36  |
| <i>Pseudopanurgus (Pterosarus)</i> sp. E4                            | 1   |
| <i>Pseudopanurgus (Pterosarus)</i> n. sp. (aff. <i>irregularis</i> ) | 377 |

**Apidae, 158 species, 22 genera, 4 new species**

Apinae

*Anthophora*, 22 species, 3 new species

|                                             |     |
|---------------------------------------------|-----|
| <i>Anthophora (Anthophoroides)</i> n. sp. 1 | 7   |
| <i>Anthophora (Anthophoroides)</i> n. sp. 2 | 114 |

|                                                                            |      |    |
|----------------------------------------------------------------------------|------|----|
| <i>Anthophora (Anthophoroides) pueblo</i> Orr, 2016                        | 2    | CP |
| <i>Anthophora (Heliophila) albata</i> Cresson, 1876                        | 271  |    |
| <i>Anthophora (Lophanthophora) affabilis</i> Cresson, 1878                 | 39   |    |
| <i>Anthophora (Lophanthophora) dammersi</i> Timberlake, 1937               | 26   |    |
| <i>Anthophora (Lophanthophora) neglecta</i> Timberlake and Cockerell, 1936 | 130  |    |
| <i>Anthophora (Lophanthophora) pacifica</i> Cresson, 1878                  | 41   |    |
| <i>Anthophora (Lophanthophora) porterae</i> Cockerell, 1900                | 19   |    |
| <i>Anthophora (Lophanthophora) ursina</i> Cresson, 1869                    | 26   |    |
| <i>Anthophora (Melea) bomboides</i> Kirby, 1838                            | 57   |    |
| <i>Anthophora (Melea) occidentalis</i> Cresson, 1869                       | 59   |    |
| <i>Anthophora (Micranthophora) albata</i> Cresson, 1876                    | 2    |    |
| <i>Anthophora (Micranthophora) curta</i> Provancher, 1895                  | 7    |    |
| <i>Anthophora (Micranthophora) escalante</i> Orr, 2017                     | 4    | CP |
| <i>Anthophora (Micranthophora) peritomae</i> Cockerell, 1905               | 390  |    |
| <i>Anthophora (Micranthophora) petrophila</i> Cockerell, 1905              | 747  |    |
| <i>Anthophora (Mystacanthophora) montana</i> Cresson, 1869                 | 26   |    |
| <i>Anthophora (Mystacanthophora) urbana</i> Cresson, 1878                  | 1326 |    |
| <i>Anthophora (Pyganthophora) edwardsii</i> Cresson, 1878                  | 1    |    |
| <i>Anthophora (Pyganthophora) lesquerellae</i> (Cockerell, 1896)           | 81   |    |
| <i>Anthophora (Pyganthophora) n. sp.</i>                                   | 17   |    |
| <i>Anthophorula</i> , 2 species                                            |      |    |
| <i>Anthophorula (Anthophorula) albata</i> (Timberlake, 1947)               | 30   |    |
| <i>Anthophorula (Anthophorula) crenulata</i> (Timberlake, 1980)            | 38   |    |
| <i>Apis</i> , 1 species                                                    |      |    |
| <i>Apis mellifera</i> Linnaeus, 1758                                       | 2474 |    |
| <i>Bombus</i> , 6 species                                                  |      |    |
| <i>Bombus (Bombias) nevadensis</i> Cresson, 1874                           | 11   |    |
| <i>Bombus (Bombus) occidentalis</i> Greene, 1858                           | 6    |    |
| <i>Bombus (Thoracobombus) fervidus</i> (Fabricius, 1798)                   | 27   |    |
| <i>Bombus (Pyrobombus) huntii</i> Greene, 1860                             | 183  |    |
| <i>Bombus (Pyrobombus) melanopygus</i> Nylander, 1848                      | 49   |    |
| <i>Bombus (Cullumanobombus) morrisoni</i> Cresson, 1878                    | 492  |    |
| <i>Diadasia</i> , 8 species                                                |      |    |
| <i>Diadasia australis</i> (Cresson, 1878)                                  | 166  |    |
| <i>Diadasia diminuta</i> (Cresson, 1878)                                   | 599  |    |
| <i>Diadasia enavata</i> (Cresson, 1872)                                    | 52   |    |
| <i>Diadasia lutzi</i> Cockerell, 1924                                      | 135  |    |
| <i>Diadasia martialis</i> Timberlake, 1940                                 | 10   | NS |
| <i>Diadasia ochracea</i> (Cockerell, 1903)                                 | 16   |    |
| <i>Diadasia rinconis</i> Cockerell, 1897                                   | 11   |    |

|                                                                     |     |       |
|---------------------------------------------------------------------|-----|-------|
| <i>Diadasia vallicola</i> Timberlake, 1940                          | 1   | N     |
| <i>Eucera</i> , 11 species                                          |     |       |
| <i>Eucera (Synhalonia) acerba</i> (Cresson, 1879)                   | 8   |       |
| <i>Eucera (Synhalonia) edwardsii</i> (Cresson, 1878)                | 4   |       |
| <i>Eucera (Synhalonia) frater</i> (Cresson, 1878)                   | 128 | S     |
| <i>Eucera (Synhalonia) fulvitaris</i> (Cresson, 1878)               | 160 |       |
| <i>Eucera (Synhalonia) lunata</i> (Timberlake, 1969)                | 6   | N, MD |
| <i>Eucera (Synhalonia) mohavensis</i> (Timberlake, 1969)            | 44  |       |
| <i>Eucera (Synhalonia) phaceliae</i> (Cockerell, 1911)              | 71  |       |
| <i>Eucera (Synhalonia) primaveris</i> (Timberlake, 1969)            | 34  |       |
| <i>Eucera (Synhalonia) quadricincta</i> (Timberlake, 1969)          | 6   |       |
| <i>Eucera (Synhalonia) speciosa</i> (Cresson, 1878)                 | 8   |       |
| <i>Eucera (Synhalonia) territella</i> (Cockerell, 1905)             | 87  |       |
| <i>Exomalopsis</i> , 1 species                                      |     |       |
| <i>Exomalopsis (Phanomalopsis) solidaginis</i> Cockerell, 1898      | 244 |       |
| <i>Habropoda</i> , 3 species                                        |     |       |
| <i>Habropoda cineraria</i> (Smith, 1879)                            | 77  |       |
| <i>Habropoda excellens</i> (Timberlake, 1962)                       | 73  |       |
| <i>Habropoda morrisoni</i> (Cresson, 1878)                          | 236 |       |
| <i>Melissodes</i> , 27 species                                      |     |       |
| <i>Melissodes (Callimelissodes) coloradensis</i> Cresson, 1878      | 2   |       |
| <i>Melissodes (Callimelissodes) compositus</i> Tucker, 1909         | 1   |       |
| <i>Melissodes (Callimelissodes) glenwoodensis</i> Cockerell, 1905   | 172 |       |
| <i>Melissodes (Eumelissodes) agilis</i> Cresson, 1878               | 93  |       |
| <i>Melissodes (Eumelissodes) bicoloratus</i> LaBerge, 1961          | 38  |       |
| <i>Melissodes (Eumelissodes) bimatrix</i> LaBerge, 1961             | 378 |       |
| <i>Melissodes (Eumelissodes) brevipyga</i> LaBerge, 1961            | 2   |       |
| <i>Melissodes (Eumelissodes) grindeliae</i> Cockerell, 1898         | 171 |       |
| <i>Melissodes (Eumelissodes) illatus</i> Lovell and Cockerell, 1906 | 1   |       |
| <i>Melissodes (Eumelissodes) lutulentus</i> LaBerge, 1961           | 79  |       |
| <i>Melissodes (Eumelissodes) menuachus</i> Cresson, 1868            | 17  |       |
| <i>Melissodes (Eumelissodes) montanus</i> Cresson, 1878             | 9   |       |
| <i>Melissodes (Eumelissodes) pallidisignatus</i> Cockerell, 1905    | 105 |       |
| <i>Melissodes (Eumelissodes) perlusus</i> Cockerell, 1925           | 48  |       |
| <i>Melissodes (Eumelissodes) perpolitus</i> LaBerge, 1961           | 63  |       |
| <i>Melissodes (Eumelissodes) rustica</i> (Kirby, 1802)              | 357 |       |
| <i>Melissodes (Eumelissodes) saponellus</i> Cockerell, 1908         | 28  |       |
| <i>Melissodes (Eumelissodes) semilupinus</i> Cockerell, 1905        | 133 |       |
| <i>Melissodes (Eumelissodes) snowii</i> Cresson, 1878               | 9   |       |
| <i>Melissodes (Eumelissodes) subagilis</i> Cockerell, 1905          | 4   |       |
| <i>Melissodes (Eumelissodes) submenuacha</i> Cockerell 1897         | 4   |       |



|                                                                    |     |           |
|--------------------------------------------------------------------|-----|-----------|
| <i>Melissodes (Eumelissodes) tristis</i> Cockerell, 1894           | 495 |           |
| <i>Melissodes (Eumelissodes) utahensis</i> LaBerge, 1961           | 122 |           |
| <i>Melissodes (Eumelissodes) verbosinarum</i> Cockerell, 1905      | 45  |           |
| <i>Melissodes (Tachymelissodes) dagosus</i> Cockerell, 1909        | 5   |           |
| <i>Melissodes</i> sp. E1                                           | 6   |           |
| <i>Melissodes</i> sp. M1                                           | 43  |           |
| <i>Svastra</i> , 2 species                                         |     |           |
| <i>Svastra (Epimelissodes) helianthelli</i> (Cockerell, 1905)      | 6   |           |
| <i>Svastra (Epimelissodes) obliqua expurgata</i> (Cockerell, 1925) | 7   |           |
| <i>Zacosmia</i> , 1 species                                        |     |           |
| <i>Zacosmia maculata</i> (Cresson, 1879)                           | 27  |           |
| <i>Melecta</i> , 5 species                                         |     |           |
| <i>Melecta (Melecta) alexanderi</i> Griswold and Parker, 1999      | 1   |           |
| <i>Melecta (Melecta) bohartorum</i> Linsley, 1939                  | 2   |           |
| <i>Melecta (Melecta) pacifica</i> Cresson, 1878                    | 3   |           |
| <i>Melecta (Melecta) separata separata</i> Cresson, 1879           | 4   |           |
| <i>Melecta (Melecta) thoracica</i> Cresson, 1875                   | 73  |           |
| <i>Xeromelecta</i> , 1 species                                     |     |           |
| <i>Xeromelecta (Melectomorpha) californica</i> (Cresson, 1878)     | 29  |           |
| Nomadinae                                                          |     |           |
| <i>Epeolus</i> , 5 species                                         |     |           |
| <i>Epeolus mesillae mesillae</i> (Cockerell, 1895)                 | 6   |           |
| <i>Epeolus minimus</i> (Robertson, 1902)                           | 56  |           |
| <i>Epeolus pusillus</i> Cresson, 1864                              | 37  |           |
| <i>Epeolus scutellaris</i> Say, 1824                               | 4   |           |
| <i>Epeolus</i> sp. 3                                               | 1   |           |
| <i>Hexepeolus</i> , 1 species                                      |     | NG,<br>MD |
| <i>Hexepeolus rhodogyne</i> Linsley and Michener, 1937             | 1   |           |
| <i>Holcopasites</i> , 1 species                                    |     |           |
| <i>Holcopasites pulchellus</i> (Cresson, 1878)                     | 8   |           |
| <i>Neolarra</i> , 5 species                                        |     |           |
| <i>Neolarra (Neolarra) penicula</i> Shanks, 1978                   | 6   |           |
| <i>Neolarra (Neolarra)</i> sp. 1                                   | 22  |           |
| <i>Neolarra (Neolarra) verbosinae</i> (Cockerell, 1895)            | 7   |           |
| <i>Neolarra (Phileremulus) cockerelli</i> (Crawford, 1916)         | 11  |           |
| <i>Neolarra (Phileremulus) vigilans</i> (Cockerell, 1895)          | 8   |           |
| <i>Nomada</i> , 34 species, 1 new species                          |     |           |
| <i>Nomada (Centrias) crotchii</i> Cresson, 1878                    | 18  |           |
| <i>Nomada (Centrias) munda</i> Cresson, 1878                       | 2   |           |
| <i>Nomada (Centrias)</i> sp. E1                                    | 13  |           |

|                                                    |     |        |
|----------------------------------------------------|-----|--------|
| <i>Nomada (Centrias)</i> sp. E2                    | 8   |        |
| <i>Nomada (Holonomada) edwardsii</i> Cresson, 1878 | 39  |        |
| <i>Nomada (Holonomada) parkeri</i> Evans, 1972     | 9   |        |
| <i>Nomada (Laminomada)</i> n. sp.                  | 3   |        |
| <i>Nomada (Micronomada)</i> sp. E1                 | 4   |        |
| <i>Nomada (Micronomada)</i> sp. E2                 | 4   |        |
| <i>Nomada (Micronomada)</i> sp. E3                 | 1   |        |
| <i>Nomada (Micronomada)</i> sp. E4                 | 5   |        |
| <i>Nomada (Nomada)</i> sp. E1                      | 161 |        |
| <i>Nomada (Nomada)</i> sp. E2                      | 17  |        |
| <i>Nomada (Nomada)</i> sp. E3                      | 118 |        |
| <i>Nomada (Nomada)</i> sp. E4                      | 153 |        |
| <i>Nomada (Nomada)</i> sp. E5                      | 13  |        |
| <i>Nomada (Nomada)</i> sp. E6                      | 4   |        |
| <i>Nomada (Nomada)</i> sp. E7                      | 23  |        |
| <i>Nomada (Nomada)</i> sp. E8                      | 40  |        |
| <i>Nomada (Nomada)</i> sp. E10                     | 2   |        |
| <i>Nomada (Nomada)</i> sp. E11                     | 28  |        |
| <i>Nomada (Nomada)</i> sp. E12                     | 8   |        |
| <i>Nomada (Nomada)</i> sp. E13                     | 1   |        |
| <i>Nomada (Nomada)</i> sp. E14                     | 7   |        |
| <i>Nomada (Nomada)</i> sp. E15                     | 18  |        |
| <i>Nomada (Nomada)</i> sp. E16                     | 14  |        |
| <i>Nomada (Nomada)</i> sp. E17                     | 4   |        |
| <i>Nomada (Nomada)</i> sp. E18                     | 26  |        |
| <i>Nomada (Nomada)</i> sp. E19                     | 3   |        |
| <i>Nomada (Nomada)</i> sp. E20                     | 1   |        |
| <i>Nomada (Nomada)</i> sp. E22                     | 11  |        |
| <i>Nomada (Nomada)</i> sp. E23                     | 4   |        |
| <i>Nomada (Nomada)</i> sp. E25                     | 1   |        |
| <i>Nomada (Nomadita) mutans</i> Cockerell, 1910    | 5   |        |
| <i>Oreopasites</i> , 1 species                     |     |        |
| <i>Oreopasites</i> sp.                             | 1   |        |
| <i>Paranomada</i> , 1 species                      |     |        |
| <i>Paranomada</i> sp. 1 (aff. <i>nitida</i> )      | 1   | NG, SD |
| <i>Triepeolus</i> , 14 species                     |     |        |
| <i>Triepeolus balteatus</i> Cockerell, 1921        | 26  | S      |
| <i>Triepeolus dacotensis</i> (Stevens, 1919)       | 3   |        |
| <i>Triepeolus denverensis</i> Cockerell, 1910      | 4   |        |
| <i>Triepeolus diversipes</i> Cockerell, 1924       | 3   |        |
| <i>Triepeolus eldoradensis</i> (Cockerell, 1910)   | 16  |        |

|                                                                       |      |   |
|-----------------------------------------------------------------------|------|---|
| <i>Triepeolus helianthi</i> (Robertson, 1897)                         | 4    |   |
| <i>Triepeolus micropygius</i> Robertson, 1903                         | 2    |   |
| <i>Triepeolus norae</i> Cockerell, 1907                               | 1    |   |
| <i>Triepeolus subalpinus</i> Cockerell, 1910                          | 21   |   |
| <i>Triepeolus timberlakei</i> Cockerell, 1929                         | 34   |   |
| <i>Triepeolus</i> sp. 42                                              | 6    |   |
| <i>Triepeolus</i> sp. 51                                              | 1    |   |
| <i>Triepeolus</i> sp. 69                                              | 5    |   |
| <i>Triepeolus</i> sp. 76                                              | 1    |   |
| <b>Xylocopinae</b>                                                    |      |   |
| <i>Ceratina</i> , 4 species                                           |      |   |
| <i>Ceratina (Zadontomerus) apacheorum</i> Daly, 1973                  | 265  |   |
| <i>Ceratina (Zadontomerus) nanula</i> Cockerell, 1897                 | 5188 |   |
| <i>Ceratina (Zadontomerus) neomexicana</i> Cockerell, 1901            | 608  |   |
| <i>Ceratina (Zadontomerus) pacifica</i> H. S. Smith, 1907             | 678  |   |
| <i>Xylocopa</i> , 2 species                                           |      |   |
| <i>Xylocopa (Xylocopoides) californica</i> Cresson, 1864              | 199  |   |
| <i>Xylocopa (Notoxylocopa) tabaniformis androleuca</i> Michener, 1940 | 27   |   |
| <b>Colletidae, 34 species, 2 genera, 6 new species</b>                |      |   |
| <b>Colletinae</b>                                                     |      |   |
| <i>Colletes</i> , 22 species, 3 new species                           |      |   |
| <i>Colletes compactus</i> Cresson, 1868                               | 43   |   |
| <i>Colletes daleae</i> Cockerell, 1897                                | 687  |   |
| <i>Colletes eulophi</i> Robertson, 1891                               | 70   |   |
| <i>Colletes fulgidus fulgidus</i> Swenk, 1904                         | 1    |   |
| <i>Colletes gypsicolens</i> Cockerell, 1897                           | 416  |   |
| <i>Colletes intermixtus</i> Swenk, 1905                               | 2    |   |
| <i>Colletes kincaidii</i> Cockerell, 1898                             | 1    |   |
| <i>Colletes larreae</i> Timberlake, 1951                              | 73   |   |
| <i>Colletes laticinctus</i> Timberlake, 1951                          | 33   |   |
| <i>Colletes louisae</i> Cockerell, 1897                               | 265  |   |
| <i>Colletes lutzi lutzi</i> Timberlake, 1943                          | 6    |   |
| <i>Colletes mandibularis</i> Smith, 1853                              | 9    |   |
| <i>Colletes petalostemonis</i> Swenk, 1906                            | 178  | W |
| <i>Colletes phaceliae</i> Cockerell, 1906                             | 1359 |   |
| <i>Colletes simulans nevadensis</i> Swenk, 1908                       | 96   |   |
| <i>Colletes slevini</i> Cockerell, 1925                               | 503  |   |
| <i>Colletes sphaeralceae</i> Timberlake, 1951                         | 316  |   |
| <i>Colletes</i> sp. 1                                                 | 57   |   |
| <i>Colletes</i> sp. 2 (aff. <i>petalostemonis</i> )                   | 32   |   |

|                                                         |                                                                                     |      |
|---------------------------------------------------------|-------------------------------------------------------------------------------------|------|
|                                                         | <i>Colletes</i> n. sp. 1 (aff. <i>algarobiae</i> )                                  | 2    |
|                                                         | <i>Colletes</i> n. sp. 2 (aff. <i>aberrans</i> )                                    | 6    |
|                                                         | <i>Colletes</i> n. sp. 3                                                            | 4    |
| Hylaeinae                                               |                                                                                     |      |
|                                                         | <i>Hylaeus</i> , 12 species, 3 new species                                          |      |
|                                                         | <i>Hylaeus</i> ( <i>Hylaeus</i> ) <i>leptocephalus</i> (Morawitz, 1871)             | 16   |
|                                                         | <i>Hylaeus</i> ( <i>Hylaeus</i> ) <i>granulatus</i> (Metz, 1911)                    | 6    |
|                                                         | <i>Hylaeus</i> ( <i>Hylaeus</i> ) <i>mesillae cressoni</i> (Cockerell, 1907)        | 605  |
|                                                         | <i>Hylaeus</i> ( <i>Hylaeus</i> ) <i>rudbeckiae</i> (Cockerell and Casad, 1895)     | 2    |
|                                                         | <i>Hylaeus</i> ( <i>Hylaeus</i> ) <i>verticalis</i> (Cresson, 1869)                 | 1    |
|                                                         | <i>Hylaeus</i> ( <i>Hylaeus</i> ) sp. 1 (aff. <i>mesillae</i> )                     | 195  |
|                                                         | <i>Hylaeus</i> ( <i>Paraprosopis</i> ) <i>coloradensis</i> (Cockerell, 1896)        | 2    |
|                                                         | <i>Hylaeus</i> ( <i>Paraprosopis</i> ) <i>megalotis</i> (Swenk and Cockerell, 1910) | 929  |
|                                                         | <i>Hylaeus</i> ( <i>Paraprosopis</i> ) <i>wootoni</i> (Cockerell, 1896)             | 494  |
|                                                         | <i>Hylaeus</i> ( <i>Paraprosopis</i> ) n. sp. 1 (aff. <i>cookii</i> )               | 1228 |
|                                                         | <i>Hylaeus</i> ( <i>Paraprosopis</i> ) n. sp. 2                                     | 129  |
|                                                         | <i>Hylaeus</i> ( <i>Prosopis</i> ) n. sp. 3                                         | 1010 |
| <b>Halictidae, 114 species, 7 genera, 2 new species</b> |                                                                                     |      |
| Halictinae                                              |                                                                                     |      |
|                                                         | <i>Agapostemon</i> , 5 species, 1 new species                                       |      |
|                                                         | <i>Agapostemon</i> ( <i>Agapostemon</i> ) <i>angelicus</i> Cockerell, 1924          | 231* |
|                                                         | <i>Agapostemon</i> ( <i>Agapostemon</i> ) <i>texanus</i> Cresson, 1872              | 185* |
|                                                         | <i>Agapostemon</i> ( <i>Agapostemon</i> ) <i>femoratus</i> Crawford, 1901           | 2    |
|                                                         | <i>Agapostemon</i> ( <i>Agapostemon</i> ) <i>melliventris</i> Cresson, 1874         | 15   |
|                                                         | <i>Agapostemon</i> ( <i>Agapostemon</i> ) n. sp. (aff. <i>splendens</i> )           | 7    |
|                                                         | <i>Halictus</i> , 5 species                                                         |      |
|                                                         | <i>Halictus</i> ( <i>Nealictus</i> ) <i>farinosus</i> Smith, 1853                   | 170  |
|                                                         | <i>Halictus</i> ( <i>Odontalictus</i> ) <i>ligatus</i> Say, 1837                    | 33   |
|                                                         | <i>Halictus</i> ( <i>Protohalictus</i> ) <i>rubicundus</i> (Christ, 1791)           | 12   |
|                                                         | <i>Halictus</i> ( <i>Seladonia</i> ) <i>confusus</i> Smith, 1853                    | 8    |
|                                                         | <i>Halictus</i> ( <i>Seladonia</i> ) <i>tripartitus</i> Cockerell, 1895             | 3676 |
|                                                         | <i>Lasioglossum</i> , 76 species                                                    |      |
|                                                         | <i>Lasioglossum</i> ( <i>Dialictus</i> ) <i>abundipunctum</i> Gibbs, 2010           | 208  |
|                                                         | <i>Lasioglossum</i> ( <i>Dialictus</i> ) <i>albohirtum</i> (Crawford, 1907)         | 581  |
|                                                         | <i>Lasioglossum</i> ( <i>Dialictus</i> ) <i>aliud</i> (Sandhouse, 1924)             | 28   |
|                                                         | <i>Lasioglossum</i> ( <i>Dialictus</i> ) <i>brunneiventre</i> (Crawford, 1907)      | 7    |
|                                                         | <i>Lasioglossum</i> ( <i>Dialictus</i> ) <i>clarissimum</i> (Ellis, 1914)           | 9    |
|                                                         | <i>Lasioglossum</i> ( <i>Dialictus</i> ) <i>clematisellum</i> (Cockerell, 1904)     | 557  |
|                                                         | <i>Lasioglossum</i> ( <i>Dialictus</i> ) <i>griswoldi</i> Gibbs, 2009               | 1    |
|                                                         | <i>Lasioglossum</i> ( <i>Dialictus</i> ) <i>hudsoniellum</i> (Cockerell, 1919)      | 86   |

|                                                                      |     |
|----------------------------------------------------------------------|-----|
| <i>Lasioglossum (Dialictus) hyalinum</i> (Crawford, 1907)            | 124 |
| <i>Lasioglossum (Dialictus) impavidum</i> (Sandhouse, 1924)          | 161 |
| <i>Lasioglossum (Dialictus) incompletum</i> (Crawford, 1907)         | 1   |
| <i>Lasioglossum (Dialictus) microlepoides</i> (Ellis, 1914)          | 8   |
| <i>Lasioglossum (Dialictus) nevadense</i> (Crawford, 1907)           | 892 |
| <i>Lasioglossum (Dialictus) pallidellum</i> (Ellis, 1914)            | 22  |
| <i>Lasioglossum (Dialictus) perdifficile</i> (Cockerell, 1895)       | 111 |
| <i>Lasioglossum (Dialictus) perparvum</i> (Ellis, 1914)              | 5   |
| <i>Lasioglossum (Dialictus) petrellum</i> (Cockerell, 1903)          | 45  |
| <i>Lasioglossum (Dialictus) prasinogaster</i> Gibbs, 2010            | 9   |
| <i>Lasioglossum (Dialictus) pruinosum</i> (Robertson, 1892)          | 143 |
| <i>Lasioglossum (Dialictus) ruidosense</i> (Cockerell, 1897)         | 275 |
| <i>Lasioglossum (Dialictus) sedi</i> (Sandhouse, 1924)               | 1   |
| <i>Lasioglossum (Dialictus) semibrunneum</i> (Cockerell, 1895)       | 10  |
| <i>Lasioglossum (Dialictus) semicaeruleum</i> (Cockerell, 1895)      | 146 |
| <i>Lasioglossum (Dialictus) tegulare</i> (Robertson, 1890)           | 88  |
| <i>Lasioglossum (Dialictus) tegulariforme</i> (Crawford, 1907)       | 41  |
| <i>Lasioglossum (Dialictus) sp. 1</i> (aff. <i>albuquerqueense</i> ) | 164 |
| <i>Lasioglossum (Dialictus) sp. 2</i> (aff. <i>aliud</i> )           | 29  |
| <i>Lasioglossum (Dialictus) sp. 3</i> (aff. <i>hudsoniellum</i> )    | 14  |
| <i>Lasioglossum (Dialictus) sp. 4</i> (aff. <i>hyalinum</i> )        | 21  |
| <i>Lasioglossum (Dialictus) sp. 5</i> (aff. <i>impavidum</i> )       | 86  |
| <i>Lasioglossum (Dialictus) sp. 6</i> (aff. <i>pacatum</i> )         | 3   |
| <i>Lasioglossum (Dialictus) sp. 7</i> (aff. <i>hunteri</i> )         | 13  |
| <i>Lasioglossum (Dialictus) sp. 8</i> (aff. <i>nevadense</i> )       | 27  |
| <i>Lasioglossum (Dialictus) sp. 9</i> (aff. <i>pruinosum</i> )       | 2   |
| <i>Lasioglossum (Dialictus) sp. A</i>                                | 57  |
| <i>Lasioglossum (Dialictus) sp. E1</i>                               | 57  |
| <i>Lasioglossum (Dialictus) sp. E2</i>                               | 34  |
| <i>Lasioglossum (Dialictus) sp. E3</i>                               | 3   |
| <i>Lasioglossum (Dialictus) sp. E5</i>                               | 7   |
| <i>Lasioglossum (Dialictus) sp. E6</i>                               | 52  |
| <i>Lasioglossum (Dialictus) sp. E7</i>                               | 11  |
| <i>Lasioglossum (Dialictus) sp. E8</i>                               | 7   |
| <i>Lasioglossum (Dialictus) sp. E9</i>                               | 59  |
| <i>Lasioglossum (Dialictus) sp. E10</i>                              | 4   |
| <i>Lasioglossum (Dialictus) sp. E11</i>                              | 38  |
| <i>Lasioglossum (Dialictus) sp. E12</i>                              | 1   |
| <i>Lasioglossum (Dialictus) sp. E14</i>                              | 1   |
| <i>Lasioglossum (Dialictus) sp. E16</i>                              | 5   |
| <i>Lasioglossum (Dialictus) sp. E18</i>                              | 4   |

|                                                                           |     |
|---------------------------------------------------------------------------|-----|
| <i>Lasioglossum (Dialictus) sp. E19</i>                                   | 14  |
| <i>Lasioglossum (Dialictus) sp. E22</i>                                   | 158 |
| <i>Lasioglossum (Dialictus) sp. E23</i>                                   | 51  |
| <i>Lasioglossum (Dialictus) sp. E24</i>                                   | 52  |
| <i>Lasioglossum (Dialictus) sp. M2</i>                                    | 5   |
| <i>Lasioglossum (Dialictus) sp. M3</i>                                    | 5   |
| <i>Lasioglossum (Dialictus) sp. M11</i>                                   | 4   |
| <i>Lasioglossum (Dialictus) sp. M15</i>                                   | 16  |
| <i>Lasioglossum (Dialictus) sp. M17</i>                                   | 52  |
| <i>Lasioglossum (Evyllaesus) sp. E1</i>                                   | 52  |
| <i>Lasioglossum (Evyllaesus) sp. E2</i>                                   | 180 |
| <i>Lasioglossum (Evyllaesus) sp. E3 (aff. nigrescens)</i>                 | 1   |
| <i>Lasioglossum (Evyllaesus) sp. E5</i>                                   | 10  |
| <i>Lasioglossum (Evyllaesus) sp. E7</i>                                   | 14  |
| <i>Lasioglossum (Hemihalictus s.l.) inconditum</i> (Cockerell, 1916)      | 285 |
| <i>Lasioglossum (Hemihalictus s.l.) ovaliceps</i> (Cockerell, 1898)       | 112 |
| <i>Lasioglossum (Hemihalictus s.l.) pectoraloides</i> (Cockerell, 1895)   | 4   |
| <i>Lasioglossum (Hemihalictus s.l.) pulveris</i> (Cockerell, 1930)        | 395 |
| <i>Lasioglossum (Hemihalictus s.l.) swenki</i> (Crawford, 1906)           | 21  |
| <i>Lasioglossum (Lasioglossum) egregium</i> (Vachal, 1904)                | 179 |
| <i>Lasioglossum (Lasioglossum) heterorhinum</i> (Cockerell, 1930)         | 12  |
| <i>Lasioglossum (Lasioglossum) lampronotum</i> (Cameron, 1905)            | 70  |
| <i>Lasioglossum (Lasioglossum) sisymbrii</i> (Cockerell, 1895)            | 368 |
| <i>Lasioglossum (Sphecodogastra s.l.) cooleyi</i> (Crawford, 1906)        | 2   |
| <i>Lasioglossum (Sphecodogastra) lusorium</i> (Cresson, 1872)             | 49  |
| <i>Lasioglossum (Sphecodogastra s.l.) nigrescens</i> (Crawford, 1907)     | 14  |
| <i>Lasioglossum (Sphecodogastra) noctivaga</i> Linsley and MacSwain, 1962 | 11  |
| <i>Sphecodes</i> , 18 species                                             |     |
| <i>Sphecodes sp. E1</i>                                                   | 11  |
| <i>Sphecodes sp. E2</i>                                                   | 323 |
| <i>Sphecodes sp. E3</i>                                                   | 54  |
| <i>Sphecodes sp. E4</i>                                                   | 2   |
| <i>Sphecodes sp. E5</i>                                                   | 5   |
| <i>Sphecodes sp. E6</i>                                                   | 5   |
| <i>Sphecodes sp. E7</i>                                                   | 52  |
| <i>Sphecodes sp. E8</i>                                                   | 178 |
| <i>Sphecodes sp. E9</i>                                                   | 2   |
| <i>Sphecodes sp. E10</i>                                                  | 1   |
| <i>Sphecodes sp. E11</i>                                                  | 1   |

|                                                             |                                                                        |     |   |
|-------------------------------------------------------------|------------------------------------------------------------------------|-----|---|
|                                                             | <i>Sphcodes</i> sp. E12                                                | 6   |   |
|                                                             | <i>Sphcodes</i> sp. E13                                                | 4   |   |
|                                                             | <i>Sphcodes</i> sp. E14                                                | 29  |   |
|                                                             | <i>Sphcodes</i> sp. E15                                                | 5   |   |
|                                                             | <i>Sphcodes</i> sp. E16                                                | 2   |   |
|                                                             | <i>Sphcodes</i> sp. E17                                                | 3   |   |
|                                                             | <i>Sphcodes</i> sp. E18                                                | 16  |   |
| Nomiinae                                                    |                                                                        |     |   |
|                                                             | <i>Dieunomia</i> , 2 species                                           |     |   |
|                                                             | <i>Dieunomia (Dieunomia) heteropoda</i> (Say, 1824)                    | 11  |   |
|                                                             | <i>Dieunomia (Epinomia) nevadensis</i> (Cresson, 1874)                 | 300 |   |
|                                                             | <i>Nomia</i> , 1 species                                               |     |   |
|                                                             | <i>Nomia (Acunomia) tetrazonata tetrazonata</i> Cockerell, 1910        | 2   | N |
| Rophitinae                                                  |                                                                        |     |   |
|                                                             | <i>Dufourea</i> , 7 species, 1 new species                             |     |   |
|                                                             | <i>Dufourea contarovici</i> Bohart, 1980                               | 3   |   |
|                                                             | <i>Dufourea harveyi</i> (Cockerell, 1906)                              | 1   |   |
|                                                             | <i>Dufourea malacothricis</i> Timberlake, 1939                         | 138 |   |
|                                                             | <i>Dufourea sandhouseae</i> (Michener, 1937)                           | 34  |   |
|                                                             | <i>Dufourea tinsleyi</i> (Cockerell, 1898)                             | 5   |   |
|                                                             | <i>Dufourea</i> n. sp. 1                                               | 8   |   |
|                                                             | <i>Dufourea</i> sp. (aff. <i>saundersi</i> )                           | 2   |   |
| <b>Megachilidae, 173 species, 15 genera, 12 new species</b> |                                                                        |     |   |
| Megachilinae                                                |                                                                        |     |   |
|                                                             | <i>Anthidiellum</i> , 1 species                                        |     |   |
|                                                             | <i>Anthidiellum (Loyalanthidium) notatum</i> (Latreille, 1809)         | 89  |   |
|                                                             | <i>Anthidium</i> , 12 species                                          |     |   |
|                                                             | <i>Anthidium (Anthidium) atripes</i> Cresson, 1879                     | 95  |   |
|                                                             | <i>Anthidium (Anthidium) atripoides</i> Gonzalez and Griswold, 2013    | 55  |   |
|                                                             | <i>Anthidium (Anthidium) cockerelli</i> Schwarz, 1928                  | 34  |   |
|                                                             | <i>Anthidium (Anthidium) dammersi</i> Cockerell, 1937                  | 27  |   |
|                                                             | <i>Anthidium (Anthidium) duomarginatum</i> Gonzalez and Griswold, 2013 | 1   |   |
|                                                             | <i>Anthidium (Anthidium) emarginatum</i> (Say, 1824)                   | 1   |   |
|                                                             | <i>Anthidium (Anthidium) maculosum</i> Cresson, 1878                   | 21  |   |
|                                                             | <i>Anthidium (Anthidium) mormonum</i> Cresson, 1878                    | 149 |   |
|                                                             | <i>Anthidium (Anthidium) palmarum</i> Cockerell, 1904                  | 6   |   |
|                                                             | <i>Anthidium (Anthidium) placitum</i> Cresson, 1879                    | 111 |   |
|                                                             | <i>Anthidium (Anthidium) porterae</i> Cockerell, 1900                  | 2   |   |
|                                                             | <i>Anthidium (Anthidium) schwarzi</i> Gonzalez and Griswold,           | 2   |   |

2013

*Ashmeadiella*, 22 species, 3 new species

|                                                                     |     |    |
|---------------------------------------------------------------------|-----|----|
| <i>Ashmeadiella (Arogochila) australis</i> (Cockerell, 1902)        | 107 |    |
| <i>Ashmeadiella (Arogochila) cazieri</i> Michener, 1939             | 12  |    |
| <i>Ashmeadiella (Arogochila) erema</i> Michener, 1939               | 12  |    |
| <i>Ashmeadiella (Arogochila) lutzi</i> (Cockerell, 1930)            | 10  |    |
| <i>Ashmeadiella (Arogochila) n. sp. 1</i> (aff. <i>leachi</i> )     | 2   |    |
| <i>Ashmeadiella (Arogochila) n. sp. 2</i> (aff. <i>micheneri</i> )  | 76  |    |
| <i>Ashmeadiella (Arogochila) n. sp. 3</i> (aff. <i>salviae</i> )    | 1   |    |
| <i>Ashmeadiella (Ashmeadiella) aridula</i> Cockerell, 1910          | 703 |    |
| <i>Ashmeadiella (Ashmeadiella) buconis</i> (Say, 1837)              | 547 |    |
| <i>Ashmeadiella (Ashmeadiella) cactorum</i> (Cockerell, 1897)       | 678 |    |
| <i>Ashmeadiella (Ashmeadiella) californica</i> (Ashmead, 1897)      | 17  |    |
| <i>Ashmeadiella (Ashmeadiella) cubiceps clypeata</i> Michener, 1936 | 10  | NS |
| <i>Ashmeadiella (Ashmeadiella) difugita</i> Michener, 1939          | 1   |    |
| <i>Ashmeadiella (Ashmeadiella) foveata</i> Michener, 1939           | 19  |    |
| <i>Ashmeadiella (Ashmeadiella) gillettei</i> Titus, 1904            | 244 |    |
| <i>Ashmeadiella (Ashmeadiella) meliloti</i> (Cockerell, 1897)       | 192 |    |
| <i>Ashmeadiella (Ashmeadiella) opuntiae</i> (Cockerell, 1897)       | 464 |    |
| <i>Ashmeadiella (Ashmeadiella) sonora</i> Michener, 1939            | 103 |    |
| <i>Ashmeadiella (Ashmeadiella) vandykiella</i> Michener, 1949       | 40  | NS |
| <i>Ashmeadiella (Ashmeadiella) sp. 1</i> (aff. <i>rufipes</i> )     | 4   |    |
| <i>Ashmeadiella (Ashmeadiella) sp. 2</i> (aff. <i>titusi</i> )      | 11  |    |
| <i>Ashmeadiella (Cubitognatha) xenomastax</i> Michener, 1939        | 48  |    |

*Atoposmia*, 4 species, 3 new species

|                                                                |    |  |
|----------------------------------------------------------------|----|--|
| <i>Atoposmia (Atoposmia) sp. 1</i> (aff. <i>triodonta</i> )    | 4  |  |
| <i>Atoposmia (Atoposmia) n. sp. 1</i>                          | 48 |  |
| <i>Atoposmia (Atoposmia) n. sp. 2</i> (aff. <i>anthodyta</i> ) | 11 |  |
| <i>Atoposmia (Eremosmia) n. sp. 3</i> (aff. <i>daleae</i> )    | 47 |  |

*Coelioxys*, 9 species

|                                                             |    |    |
|-------------------------------------------------------------|----|----|
| <i>Coelioxys (Boreocoelioxys) rufitarsis</i> Smith, 1854    | 3  |    |
| <i>Coelioxys (Boreocoelioxys) sayi</i> Robertson, 1897      | 1  |    |
| <i>Coelioxys (Coelioxys) hirsutissimus</i> Cockerell, 1912  | 2  |    |
| <i>Coelioxys (Coelioxys) mitchelli</i> J. R. Baker, 1975    | 1  | NS |
| <i>Coelioxys (Cyrtocoelioxys) gilensis</i> Cockerell, 1898  | 5  |    |
| <i>Coelioxys (Synocoelioxys) apacheorum</i> Cockerell, 1900 | 1  |    |
| <i>Coelioxys (Synocoelioxys) hunteri</i> Crawford, 1914     | 11 | NS |
| <i>Coelioxys (Xerocoelioxys) grindeliae</i> Cockerell, 1900 | 13 |    |
| <i>Coelioxys (Xerocoelioxys) mesae</i> Cockerell, 1921      | 2  |    |

*Diathidium*, 9 species



|                                                                      |     |                  |
|----------------------------------------------------------------------|-----|------------------|
| <i>Dianthidium (Adanthidium) arizonicum</i> Rohwer, 1916             | 17  | NS               |
| <i>Dianthidium (Dianthidium) cressonii</i> (Dalla Torre, 1896)       | 55  |                  |
| <i>Dianthidium (Dianthidium) dubium dubium</i> Schwarz, 1928         | 1   |                  |
| <i>Dianthidium (Dianthidium) heterulkei heterulkei</i> Schwarz, 1940 | 1   |                  |
| <i>Dianthidium (Dianthidium) implicatum</i> Timberlake, 1948         | 16  |                  |
| <i>Dianthidium (Dianthidium) parvum</i> (Cresson, 1878)              | 349 |                  |
| <i>Dianthidium (Dianthidium) platyurum platyurum</i> Cockerell, 1923 | 35  |                  |
| <i>Dianthidium (Dianthidium) pudicum pudicum</i> (Cresson, 1879)     | 117 |                  |
| <i>Dianthidium (Dianthidium) ulkei</i> (Cresson, 1878)               | 302 |                  |
| <i>Dioxys</i> , 1 species                                            |     |                  |
| <i>Dioxys pomonae pomonae</i> Cockerell, 1910                        | 20  |                  |
| <i>Dioxys pomonae timberlakei</i> Hurd, 1958                         | 5   |                  |
| <i>Heriades</i> , 4 species                                          |     |                  |
| <i>Heriades (Neotrypetes) cressoni</i> Michener, 1938                | 357 |                  |
| <i>Heriades (Neotrypetes) microphthalma</i> Michener, 1954           | 730 |                  |
| <i>Heriades (Neotrypetes) timberlakei</i> Michener, 1938             | 732 |                  |
| <i>Heriades (Neotrypetes) variolosa</i> (Cresson, 1872)              | 1   |                  |
| <i>Hoplitis</i> , 9 species, 2 new species                           |     |                  |
| <i>Hoplitis (Alcidamea)</i> n. sp. 2                                 | 15  |                  |
| <i>Hoplitis (Alcidamea) grinnelli</i> (Cockerell, 1910)              | 28  |                  |
| <i>Hoplitis (Alcidamea) producta panamintana</i> Michener, 1947      | 15  |                  |
| <i>Hoplitis (Cyrtosmia) hypocrita</i> (Cockerell, 1906)              | 12  |                  |
| <i>Hoplitis (Dasyosmia) paroselae</i> Michener, 1947                 | 13  |                  |
| <i>Hoplitis (Monumetha) albifrons argentifrons</i> (Cresson, 1864)   | 28  |                  |
| <i>Hoplitis (Penteriades) incanescens</i> (Cockerell, 1922)          | 82  | CP,<br>GSEN<br>M |
| <i>Hoplitis (Proteriades)</i> n. sp. 1 (aff. <i>shoshone</i> )       | 26  |                  |
| <i>Hoplitis (Proteriades) zuni</i> (Parker, 1977)                    | 229 |                  |
| <i>Lithurgopsis</i> , 1 species                                      |     |                  |
| <i>Lithurgopsis apicalis</i> (Cresson, 1875)                         | 372 |                  |
| <i>Megachile</i> , 33 species, 1 new species                         |     |                  |
| <i>Megachile (Argyropile) parallela</i> Smith, 1853                  | 88  |                  |
| <i>Megachile (Argyropile) rossi</i> Mitchell, 1943                   | 9   |                  |
| <i>Megachile (Argyropile) townsendiana</i> Cockerell, 1898           | 3   |                  |
| <i>Megachile (Chelostomoides) prosopidis</i> Cockerell, 1900         | 136 |                  |
| <i>Megachile (Chelostomoides) subexilis</i> Cockerell, 1908          | 78  |                  |
| <i>Megachile (Eutricharea) rotundata</i> (Fabricius, 1787)           | 1   |                  |
| <i>Megachile (Litomegachile) coquilletti</i> Cockerell, 1915         | 3   |                  |
| <i>Megachile (Litomegachile) lippiae</i> Cockerell, 1900             | 84  |                  |

|                                                                |     |    |
|----------------------------------------------------------------|-----|----|
| <i>Megachile (Litomegachile) mendica</i> Cresson, 1878         | 15  |    |
| <i>Megachile (Litomegachile) onobrychidis</i> Cockerell, 1908  | 5   |    |
| <i>Megachile (Litomegachile) texana</i> Cresson, 1878          | 132 |    |
| <i>Megachile (Litomegachile) sp. 2 (aff. brevis)</i>           | 93  |    |
| <i>Megachile (Megachile) montivaga</i> Cresson, 1878           | 10  |    |
| <i>Megachile (Megachiloides) anograe</i> Cockerell, 1908       | 14  | S  |
| <i>Megachile (Megachiloides) casadae</i> Cockerell, 1898       | 30  |    |
| <i>Megachile (Megachiloides) legalis</i> Cresson, 1879         | 61  |    |
| <i>Megachile (Megachiloides) manifesta</i> Cresson, 1878       | 12  | CP |
| <i>Megachile (Megachiloides) micheneri</i> Mitchell, 1936      | 1   |    |
| <i>Megachile (Megachiloides) mucorosa</i> Cockerell, 1908      | 2   | CP |
| <i>Megachile (Megachiloides) nevadensis</i> Cresson, 1879      | 341 |    |
| <i>Megachile (Megachiloides) subanograe</i> Mitchell, 1934     | 59  |    |
| <i>Megachile (Megachiloides) sublaurita</i> Mitchell, 1927     | 79  |    |
| <i>Megachile (Megachiloides) subnigra</i> Cresson, 1879        | 35  |    |
| <i>Megachile (Megachiloides) sp. 1</i>                         | 1   |    |
| <i>Megachile (Megachiloides) n. sp. (aff. umatillensis)</i>    | 17  |    |
| <i>Megachile (Sayapis) fidelis</i> Cresson, 1878               | 9   |    |
| <i>Megachile (Sayapis) inimica sayi</i> (Cresson, 1878)        | 150 |    |
| <i>Megachile (Sayapis) mellitarsis</i> Cresson, 1878           | 1   |    |
| <i>Megachile (Sayapis) pugnata</i> Say, 1837                   | 1   |    |
| <i>Megachile (Xanthosarus) agustini</i> Cockerell, 1905        | 28  | CP |
| <i>Megachile (Xanthosarus) cochisiana</i> Mitchell, 1934       | 117 |    |
| <i>Megachile (Xanthosarus) perihirta</i> Cockerell, 1898       | 6   |    |
| <i>Megachile (Xeromegachile) sp. 2</i>                         | 1   |    |
| <i>Osmia</i> , 44 species, 2 new species                       |     |    |
| <i>Osmia (Acanthosmioides) alpestris</i> Rust and Bohart, 1986 | 4   |    |
| <i>Osmia (Acanthosmioides) austromaritima</i> Michener, 1936   | 7   | S  |
| <i>Osmia (Acanthosmioides) integra</i> Cresson, 1878           | 199 |    |
| <i>Osmia (Acanthosmioides) longula</i> Cresson, 1864           | 2   |    |
| <i>Osmia (Acanthosmioides) nigrifrons</i> Cresson, 1878        | 59  |    |
| <i>Osmia (Acanthosmioides) unca</i> Michener, 1937             | 30  |    |
| <i>Osmia (Cephalosmia) californica</i> Cresson, 1864           | 115 |    |
| <i>Osmia (Cephalosmia) grinnelli</i> Cockerell, 1910           | 38  |    |
| <i>Osmia (Cephalosmia) montana montana</i> Cresson, 1864       | 4   |    |
| <i>Osmia (Cephalosmia) subaustralis</i> Cockerell, 1900        | 1   |    |
| <i>Osmia (Helicosmia) coloradensis</i> Cresson, 1878           | 167 |    |
| <i>Osmia (Helicosmia) texana</i> Cresson, 1872                 | 6   |    |
| <i>Osmia (Melanosmia) albolateralis</i> Cockerell, 1906        | 23  |    |
| <i>Osmia (Melanosmia) austromaritima</i> Michener, 1936        | 3   |    |
| <i>Osmia (Melanosmia) brevis</i> Cresson, 1864                 | 199 |    |

|                                                                |     |                  |
|----------------------------------------------------------------|-----|------------------|
| <i>Osmia (Melanosmia) bruneri</i> Cockerell, 1897              | 193 |                  |
| <i>Osmia (Melanosmia) cerasi</i> Cockerell, 1897               | 16  |                  |
| <i>Osmia (Melanosmia) clarescens</i> Cockerell, 1911           | 4   |                  |
| <i>Osmia (Melanosmia) cobaltina</i> Cresson, 1878              | 152 |                  |
| <i>Osmia (Melanosmia) crassa</i> Rust and Bohart, 1986         | 20  |                  |
| <i>Osmia (Melanosmia) dakotensis</i> Michener, 1937            | 35  |                  |
| <i>Osmia (Melanosmia) ednae</i> Cockerell, 1907                | 16  | S                |
| <i>Osmia (Melanosmia) gaudiosa</i> Cockerell, 1907             | 96  |                  |
| <i>Osmia (Melanosmia) iridis</i> Cockerell and Titus, 1902     | 21  | S                |
| <i>Osmia (Melanosmia) kincaidii</i> Cockerell, 1897            | 175 | S                |
| <i>Osmia (Melanosmia) liogastra</i> Cockerell, 1933            | 6   |                  |
| <i>Osmia (Melanosmia) marginata</i> Michener, 1936             | 6   |                  |
| <i>Osmia (Melanosmia) phenax</i> Cockerell, 1897               | 45  |                  |
| <i>Osmia (Melanosmia) prunorum</i> Cockerell, 1897             | 3   |                  |
| <i>Osmia (Melanosmia) pusilla</i> Cresson, 1864                | 2   |                  |
| <i>Osmia (Melanosmia) rawlinsi</i> Sandhouse, 1939             | 110 |                  |
| <i>Osmia (Melanosmia) sanrafaelae</i> Parker, 1985             | 161 |                  |
| <i>Osmia (Melanosmia) trevoris</i> Cockerell, 1897             | 193 |                  |
| <i>Osmia (Melanosmia) sp. 1 (aff. cyanella)</i>                | 1   |                  |
| <i>Osmia (Melanosmia) sp. E1</i>                               | 1   |                  |
| <i>Osmia (Melanosmia) sp. E2</i>                               | 1   |                  |
| <i>Osmia (Melanosmia) sp. E3</i>                               | 1   |                  |
| <i>Osmia (Melanosmia) sp. E4</i>                               | 1   |                  |
| <i>Osmia (Melanosmia) sp. E5</i>                               | 3   |                  |
| <i>Osmia (Melanosmia) n. sp. 1</i>                             | 34  | CP,<br>GSEN<br>M |
| <br>                                                           |     |                  |
| <i>Osmia (Melanosmia) n. sp. 2 (aff. enixa)</i>                | 19  |                  |
| <i>Osmia (Osmia) lignaria propinqua</i> Cresson, 1864          | 342 |                  |
| <i>Osmia (Osmia) ribifloris ribifloris</i> Cockerell, 1900     | 172 |                  |
| <i>Osmia (Trichinosmia) latisulcata</i> Michener, 1936         | 17  |                  |
| <i>Protosmia</i> , 1 species                                   |     |                  |
| <i>Protosmia (Chelostomopsis) rubifloris</i> (Cockerell, 1898) | 110 | N, MD            |
| <i>Stelis</i> , 16 species, 2 new species                      |     |                  |
| <i>Stelis (Dolichostelis) rudbeckiarum</i> Cockerell, 1904     | 12  |                  |
| <i>Stelis (Stelis) anasazi</i> Parker and Griswold, 2013       | 5   |                  |
| <i>Stelis (Stelis) carnifex</i> Cockerell, 1911                | 46  |                  |
| <i>Stelis (Stelis) imperialis</i> Parker and Griswold, 2013    | 1   |                  |
| <i>Stelis (Stelis) interrupta</i> Cresson, 1897                | 2   |                  |
| <i>Stelis (Stelis) lamelliterga</i> Parker and Griswold, 2013  | 9   |                  |
| <i>Stelis (Stelis) lateralis</i> Cresson, 1864                 | 4   |                  |

|                                                                   |     |
|-------------------------------------------------------------------|-----|
| <i>Stelis (Stelis) montana</i> Cresson, 1864                      | 3   |
| <i>Stelis (Stelis)</i> n. sp. 1                                   | 2   |
| <i>Stelis (Stelis)</i> n. sp. 2                                   | 1   |
| <i>Stelis (Stelis) occidentalis</i> Parker and Griswold, 2013     | 3   |
| <i>Stelis (Stelis) paiute</i> Parker and Griswold, 2013           | 1   |
| <i>Stelis (Stelis) palmarum</i> Timberlake, 1941                  | 12  |
| <i>Stelis (Stelis) pavonina</i> (Cockerell, 1908)                 | 1   |
| <i>Stelis (Stelis) robertsoni</i> Timberlake, 1941                | 2   |
| <i>Stelis (Stelis) submarginata</i> Cresson, 1878                 | 1   |
| <i>Trachusa</i> , 2 species                                       |     |
| <i>Trachusa (Heteranthidium) cordaticeps</i> (Michener, 1949)     | 4   |
| <i>Trachusa (Heteranthidium) zebrata</i> (Cresson, 1872)          | 1   |
| <b>Melittidae, 5 species, 1 genus, 2 new species</b>              |     |
| <i>Hesperapis</i> , 5 species, 2 new species                      |     |
| <i>Hesperapis (Carinapis) carinata</i> Stevens, 1919              | 1   |
| <i>Hesperapis (Carinapis) oliviae</i> (Cockerell, 1897)           | 26  |
| <i>Hesperapis (Disparapis)</i> sp. 1 (aff. <i>cockerelli</i> )    | 33  |
| <i>Hesperapis (Disparapis)</i> n. sp. 1 (aff. <i>disparapis</i> ) | 5   |
| <i>Hesperapis (Panurgomia)</i> n. sp. 2                           | 211 |
